# Supplementary material for: Conserved Expression of the Glutamate NMDA Receptor 1 Subunit Splice Variants during the Development of the Siberian Hamster Suprachiasmatic Nucleus
Source: PubMed Central journal article supplement (PMC3365105; doi:10.1371/journal.pone.0037496), 2012-05-31

**A**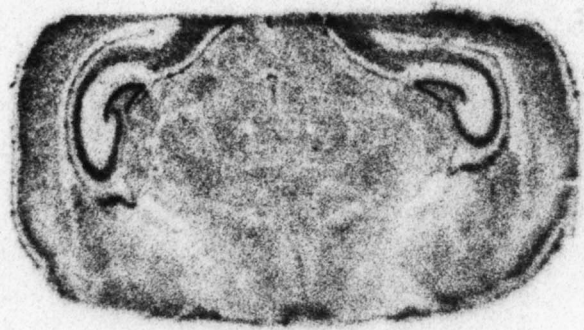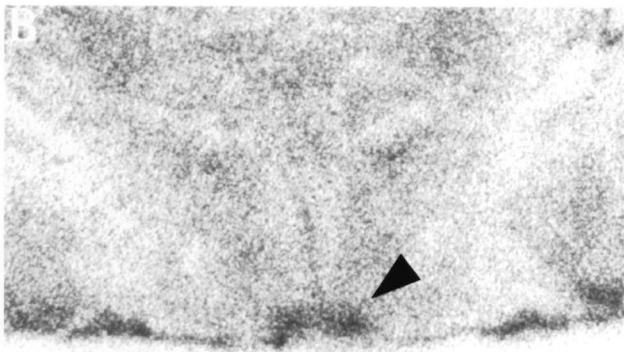**C**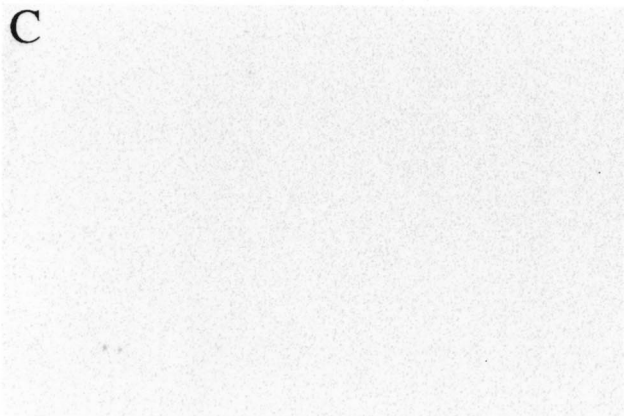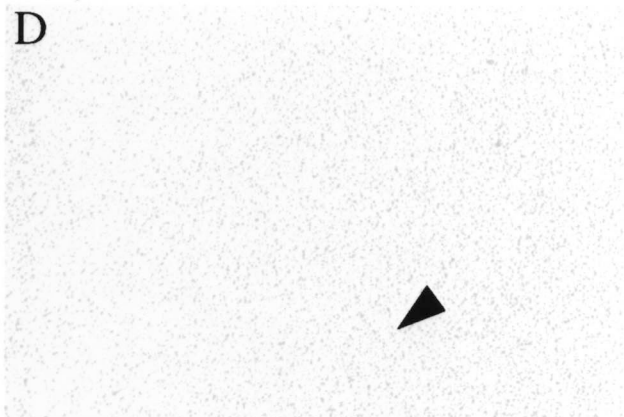**E**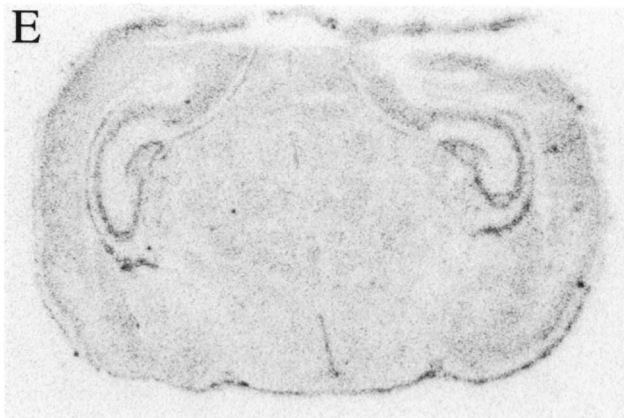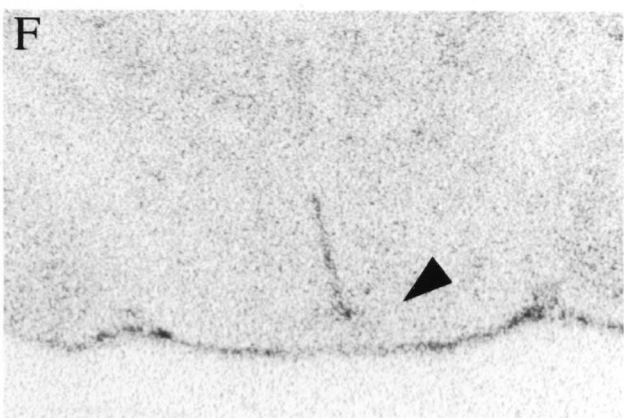**G**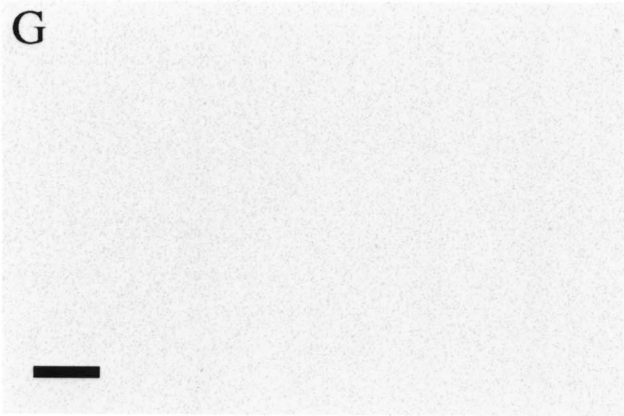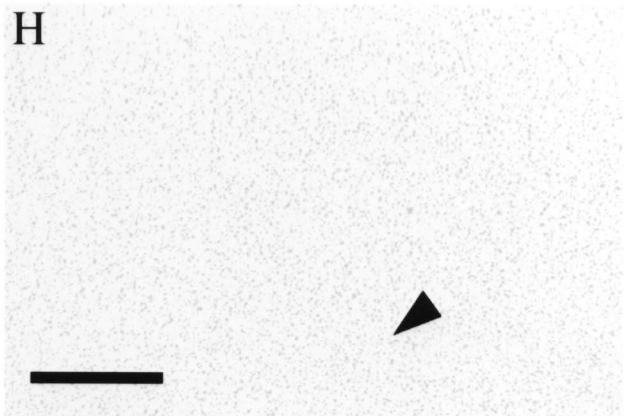

Supplement: pone.0037496.s002.pdf [file pone.0037496.s002.pdf]
