# Supplementary material for: Conserved Expression of the Glutamate NMDA Receptor 1 Subunit Splice Variants during the Development of the Siberian Hamster Suprachiasmatic Nucleus
Source: PubMed Central journal article supplement (PMC3365105; doi:10.1371/journal.pone.0037496), 2012-05-31

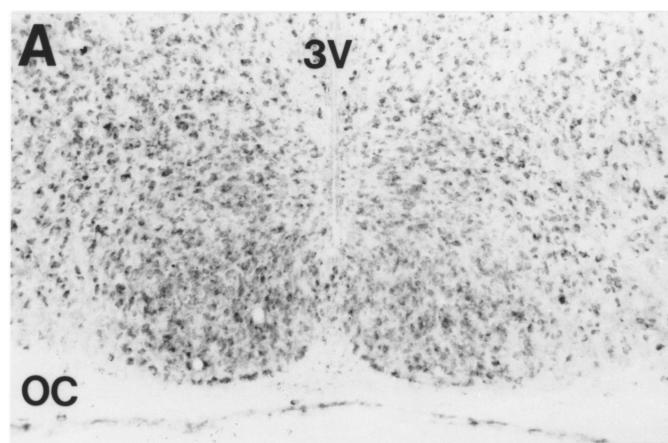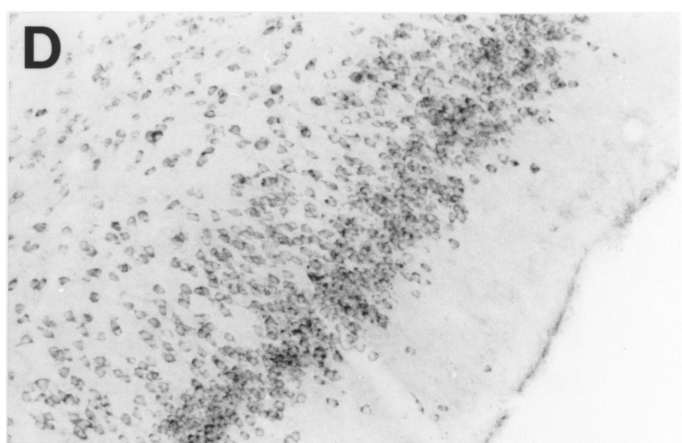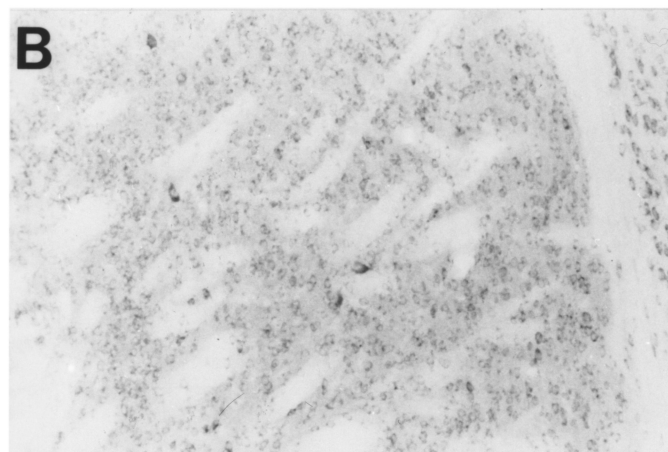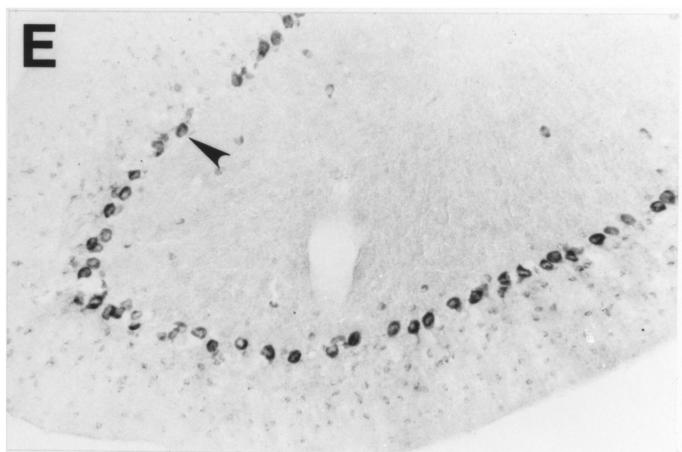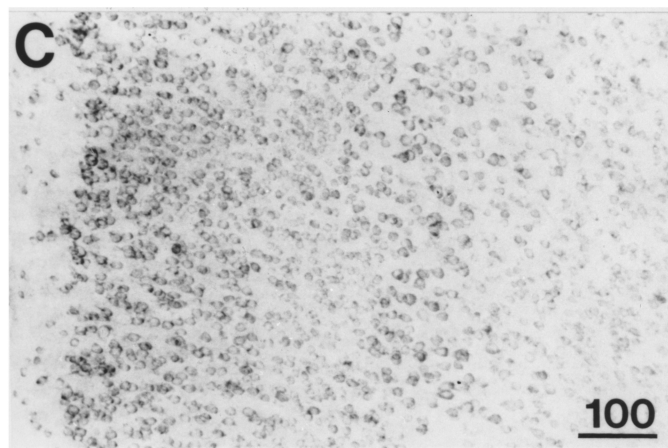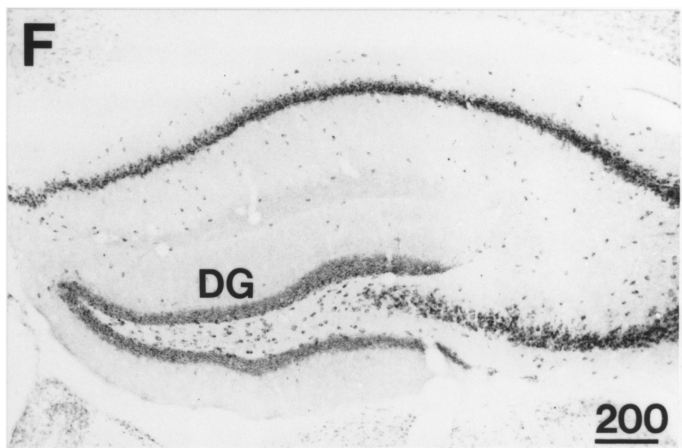

Supplement: pone.0037496.s004.pdf [file pone.0037496.s004.pdf]
