# Supplementary material for: Conserved Expression of the Glutamate NMDA Receptor 1 Subunit Splice Variants during the Development of the Siberian Hamster Suprachiasmatic Nucleus
Source: PubMed Central journal article supplement (PMC3365105; doi:10.1371/journal.pone.0037496), 2012-05-31
Supplement: pone.0037496.s005.pdf [file pone.0037496.s005.pdf]

| Oligonucleotide                  | Ref  | 5'                                               | 3' |
|----------------------------------|------|--------------------------------------------------|----|
| NR1 PAN                          |      | CTCCTCCTCACTGTTACCTTGAATCGGCCAAAGGGACTGAAGCGGTC  |    |
| NR1 N1 (presence of N region)    | [41] | CTTGGGTCCGCGCTTGTTGTCATAGGACAGTTGGTCGAGGTTTTTC   |    |
| NR1 C1 (presence of C1 region)   | [41] | CGTGTCTTTGGAGGACCTACGTCTCTTGAAGCTGGAGGCCAGGGT    |    |
| NR1 C2 (presence of C2 region)   | [41] | TATGACGGGAACACAGCTGCAGCTGGCCCTCCTCCCTCTCAATAG    |    |
| NR1 C2 sense                     | [41] | CTATTGAGAGGGAGGAGGGCCAGCTGCAGCTGTGTTCCC GTCATA   |    |
| NR1-4 (absence C1 & C2 regions)  | [25] | GATATCAGTGGGATGGTACTGCTGCAGGTTCTTCTCCAC          |    |
| NR1-b (presence of N region)     | [25] | GCGCTTGTTGTCATAGGACAGTTGGTCGAGGTTTTTCATAG        |    |
| NR1-1 (presence C1 & C2 regions) | [25] | TCCACCCCCGGTGCTCGTGTCTTTGGAGGACCTACGTCTC         |    |
| NR1-2 (C1 absent, C2 present)    | [25] | TCCACCCCCGGTGCTCTGCAGGTTCTTCTCCACACGTT           |    |
| NR1-3 (C1 present, C2 absent)    | [25] | GATATCAGTGGGATGGTACTGCGTGTCTTTGGAGGACCTA         |    |
| AVP                              |      | GTAGACCCGGGGCTTGGCAGAATCCACGGACTCTTGTGTCCCAGCCAG |    |
| VIP                              |      | GTGTCGTTTGACCGGCACGGGGTCTTCCGAGATGCTACTGCTGAT    |    |

Table S1. **Oligonucleotide probes used in the Siberian hamster and rat.** The PAN probe was designed to recognize all NR1 mRNAs and to hybridize to the rat mRNA sequence encoding the region between the transmembrane domains II and III and part of domain II [80]. Splice variant probe sequences derived from rat were as described in Standaert *et al.* [41] and Laurie and Seeburg [25]. Probes were designed to detect AVP and VIP from rat mRNA sequences [42, 43].
